# Supplementary material
Source: PubMed Central journal article supplement (PMC6899041)
Supplement: develop-146-182873-s1.pdf [file develop-146-182873-s1.pdf]

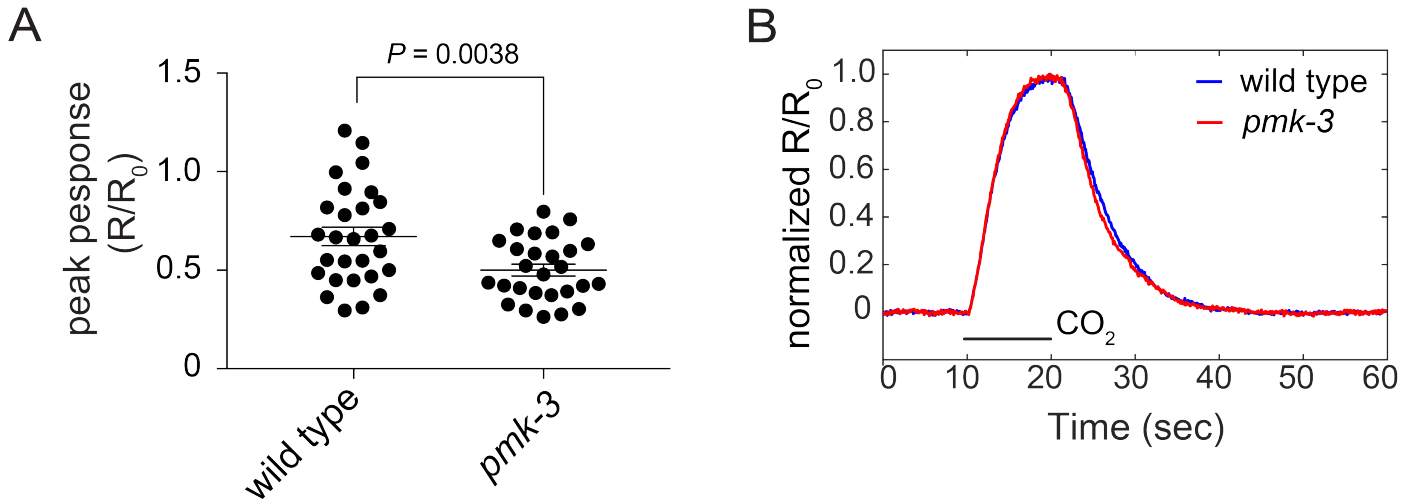

**Figure S1: *pmk-3* mutant BAG neurons exhibit impaired chemotransduction in CO<sub>2</sub>-sensing BAG neurons.**

A. Scatter plots showing the distribution of peak calcium responses (R/R<sub>0</sub> values) of wild-type and *pmk-3(ok169)* mutant BAG neurons to 10% CO<sub>2</sub> stimuli. N > 26 animals/genotype.  $P = 0.0038$ , unpaired t-test. Error bars represent SEM.

B. The dynamics of the average calcium responses of wild-type and *pmk-3(ok169)* mutant BAG neurons to 10% CO<sub>2</sub> stimuli are indistinguishable.

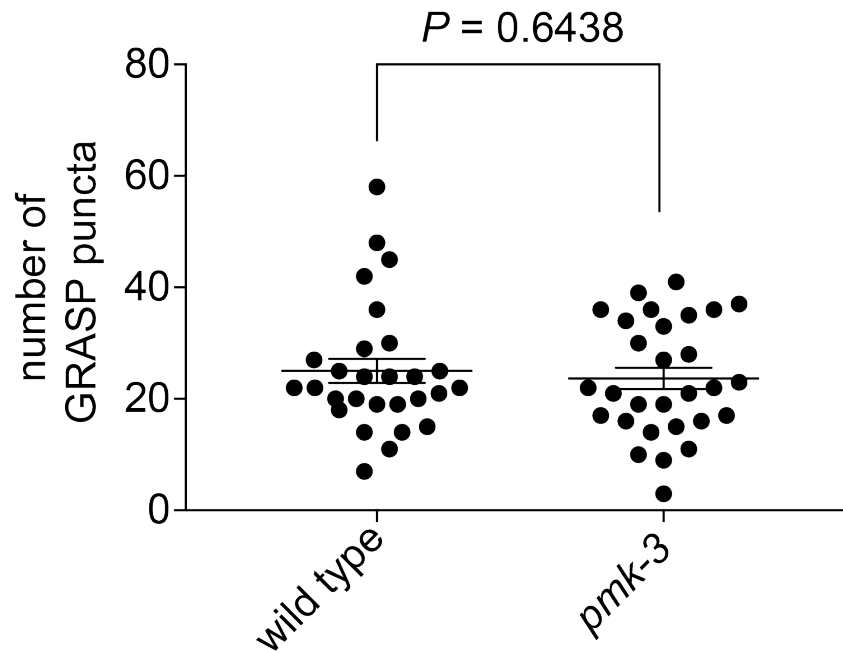

**Figure S2: *pmk-3* mutant BAG neurons form normal number of synapses.**

Scatter plot showing the number of GRASP-puncta in wild-type and *pmk-3(ok169)* mutant BAG neurons.  $P = 0.6438$ , unpaired t-test.  $N > 28$  animals/genotype. Error bars represent SEM.

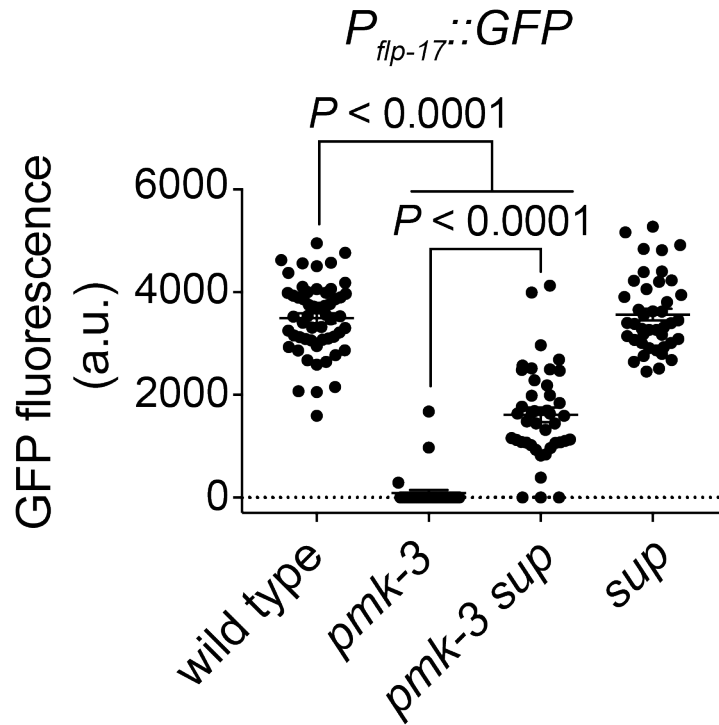

**Figure S3: Suppressor mutations partially restore the levels of *flp-17* reporter expression to *pmk-3* mutant BAG cells.**

Levels of  $P_{flp-17}::GFP$  expression in the wild-type, *pmk-3(wz31)*, *pmk-3(wz31) sup(wz75)*, and *sup(e169)* mutant animals. (\*\*\*\*)  $P < 0.0001$ , ordinary one-way ANOVA followed by Tukey's multiple comparison test.  $N > 20$  animals/genotype. (a.u.) arbitrary units. Bars represent mean  $\pm$  SEM.

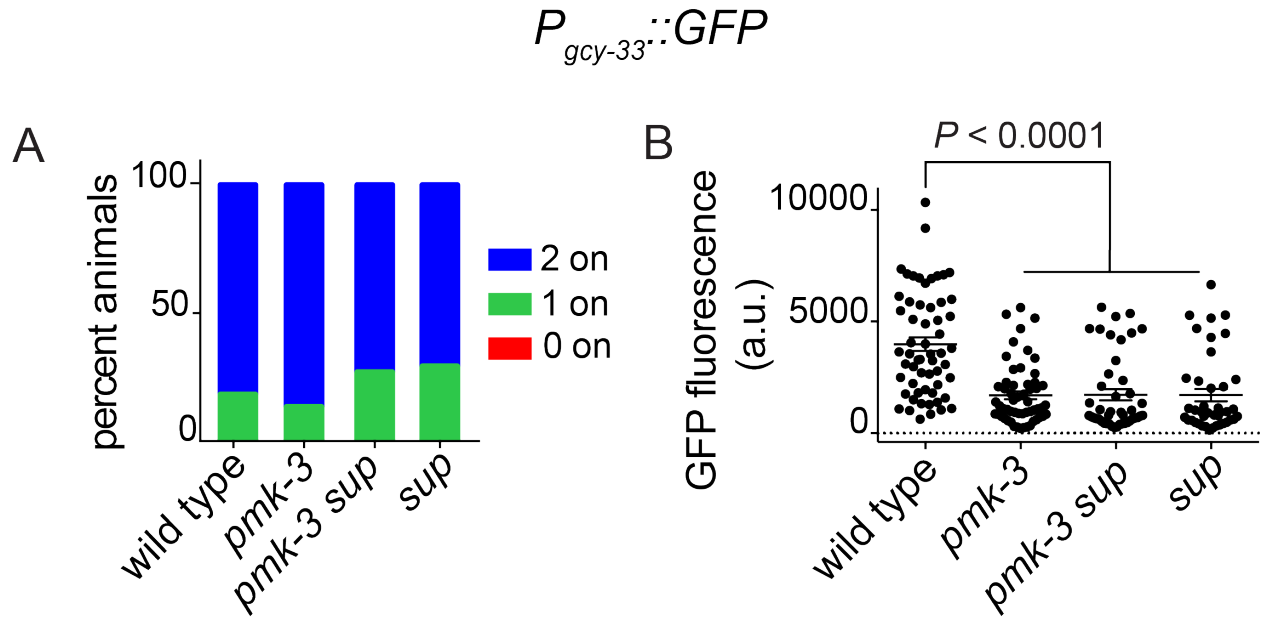

**Figure S4: Suppressor regulates some, but not all, PMK-3 regulated genes in BAG neurons.**

A. Penetrance of  $P_{gcy-33}::GFP$  expression in the wild-type, *pmk-3(wz31)*, *pmk-3(wz31) sup(wz75)*, and *sup(e169)* mutant animals.

B. Levels of  $P_{gcy-33}::GFP$  expression in the wild-type, *pmk-3(wz31)*, *pmk-3(wz31) sup(wz75)*, and *sup(e169)* mutant animals. (\*\*\*\*)  $P < 0.0001$ , ordinary one-way ANOVA followed by Tukey's multiple comparison test.  $N > 20$  animals/genotype. (a.u.) arbitrary units. Bars represent mean  $\pm$  SEM.

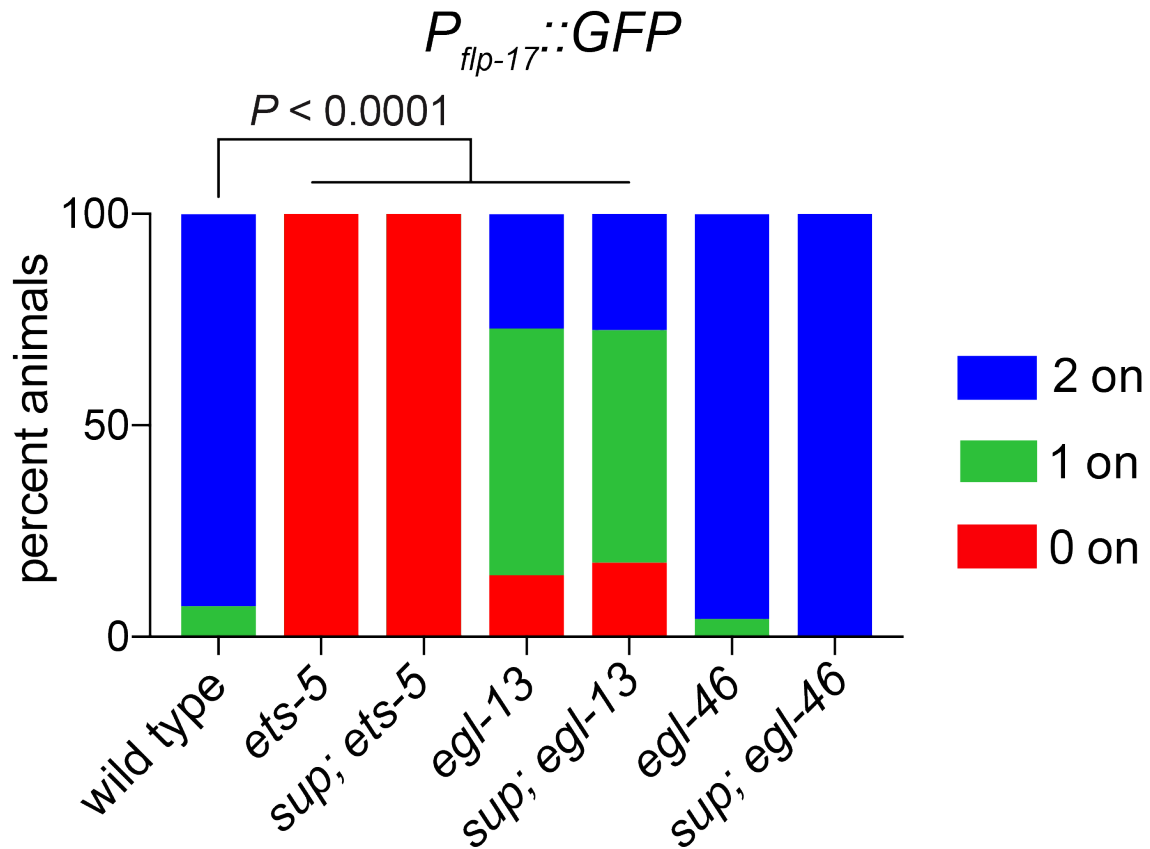

**Figure S5: Suppressor mutations do not restore gene expression to mutants for transcription factors that promote a BAG fate.**

Penetrance of  $P_{flp-17}::GFP$  expression in the wild-type, *ets-5(tm1734)*, *sup(e169); ets-5(tm1734)*, *egl-13(ku194)*, *sup(e169); egl-13(ku194)*, *egl-46(n1075)*, and *sup(e169); egl-46(n1075)* mutant animals. While *ets-5* and *egl-13* mutants are significantly defective for *flp-17* expression, the suppressor mutation does not modify their gene expression defects.  $N \geq 30$  animals/genotype.  $P < 0.0001$ , chi-square test.

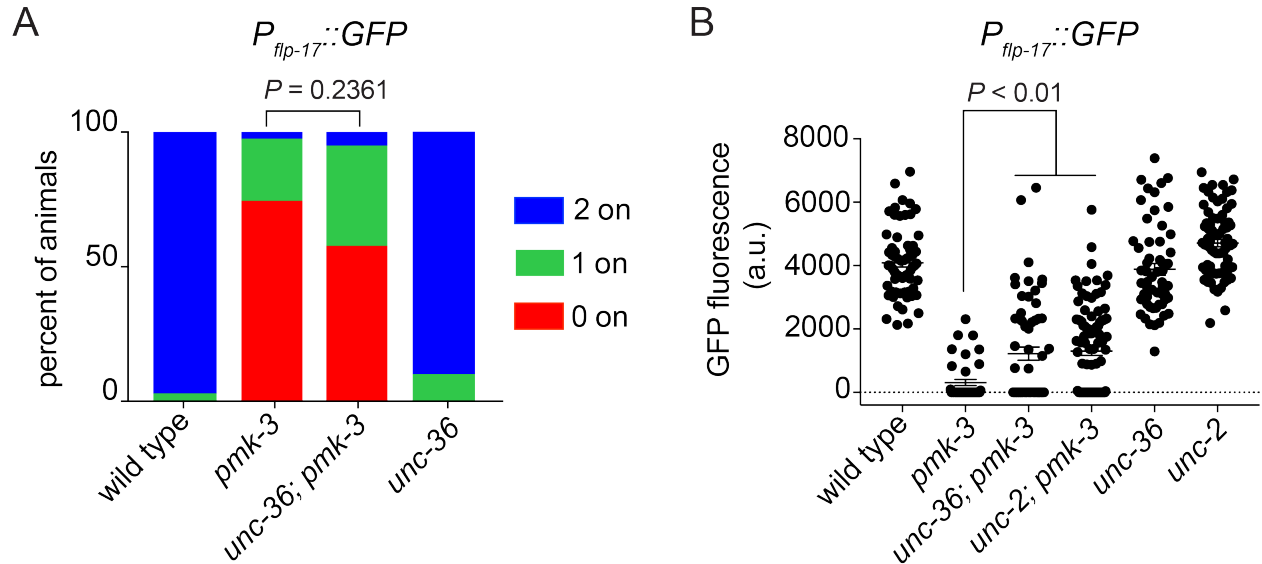

**Figure S6: Mutations in NPQ-type Voltage-Gated Calcium Channel subunits restore *flp-17* expression to *pmk-3* mutant BAG neurons.**

A. Penetrance of  $P_{flp-17}::GFP$  expression in the wild-type, *pmk-3(ok169)*, *unc-36(e251)*; *pmk-3(ok169)*, and *unc-36(e251)* mutant animals.  $N \geq 30$  animals/genotype.  $P = 0.2361$ , chi-square test.

B. Levels of  $P_{flp-17}::GFP$  expression in the wild-type, *pmk-3(ok169)*, *unc-36(e251)*; *pmk-3(ok169)*, *pmk-3(ok169)*; *unc-2(e55)*, *unc-36(e251)*, and *unc-2(e55)* mutant animals.  $N \geq 30$  animals/genotype.  $P = 0.0028$  for *pmk-3* vs *unc-36*; *pmk-3* and  $P = 0.0003$  for *pmk-3* vs *pmk-3*; *unc-2*, ordinary one-way ANOVA followed by Tukey's multiple comparison test. (a.u.) arbitrary units. Error bars represent SEM.

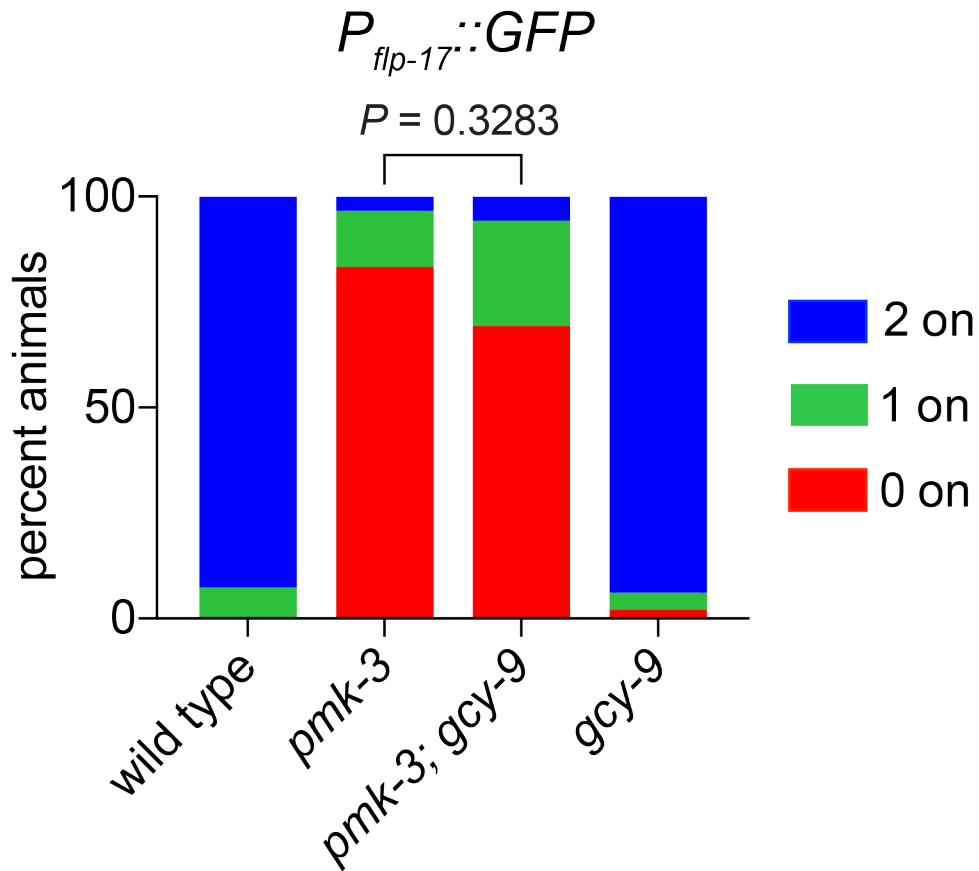

**Figure S7: Disrupting CO<sub>2</sub> sensation in *pmk-3* mutant animals does not restore *flp-17* expression to their BAG cells.**

The penetrance of  $P_{flp-17::GFP}$  expression in the wild-type, *pmk-3(ok169)*, *pmk-3(ok169); gcy-9(tm2816)*, and *gcy-9(tm2816)* mutant animals. N > 25 animals/genotype. P = 0.3283, chi-square test.

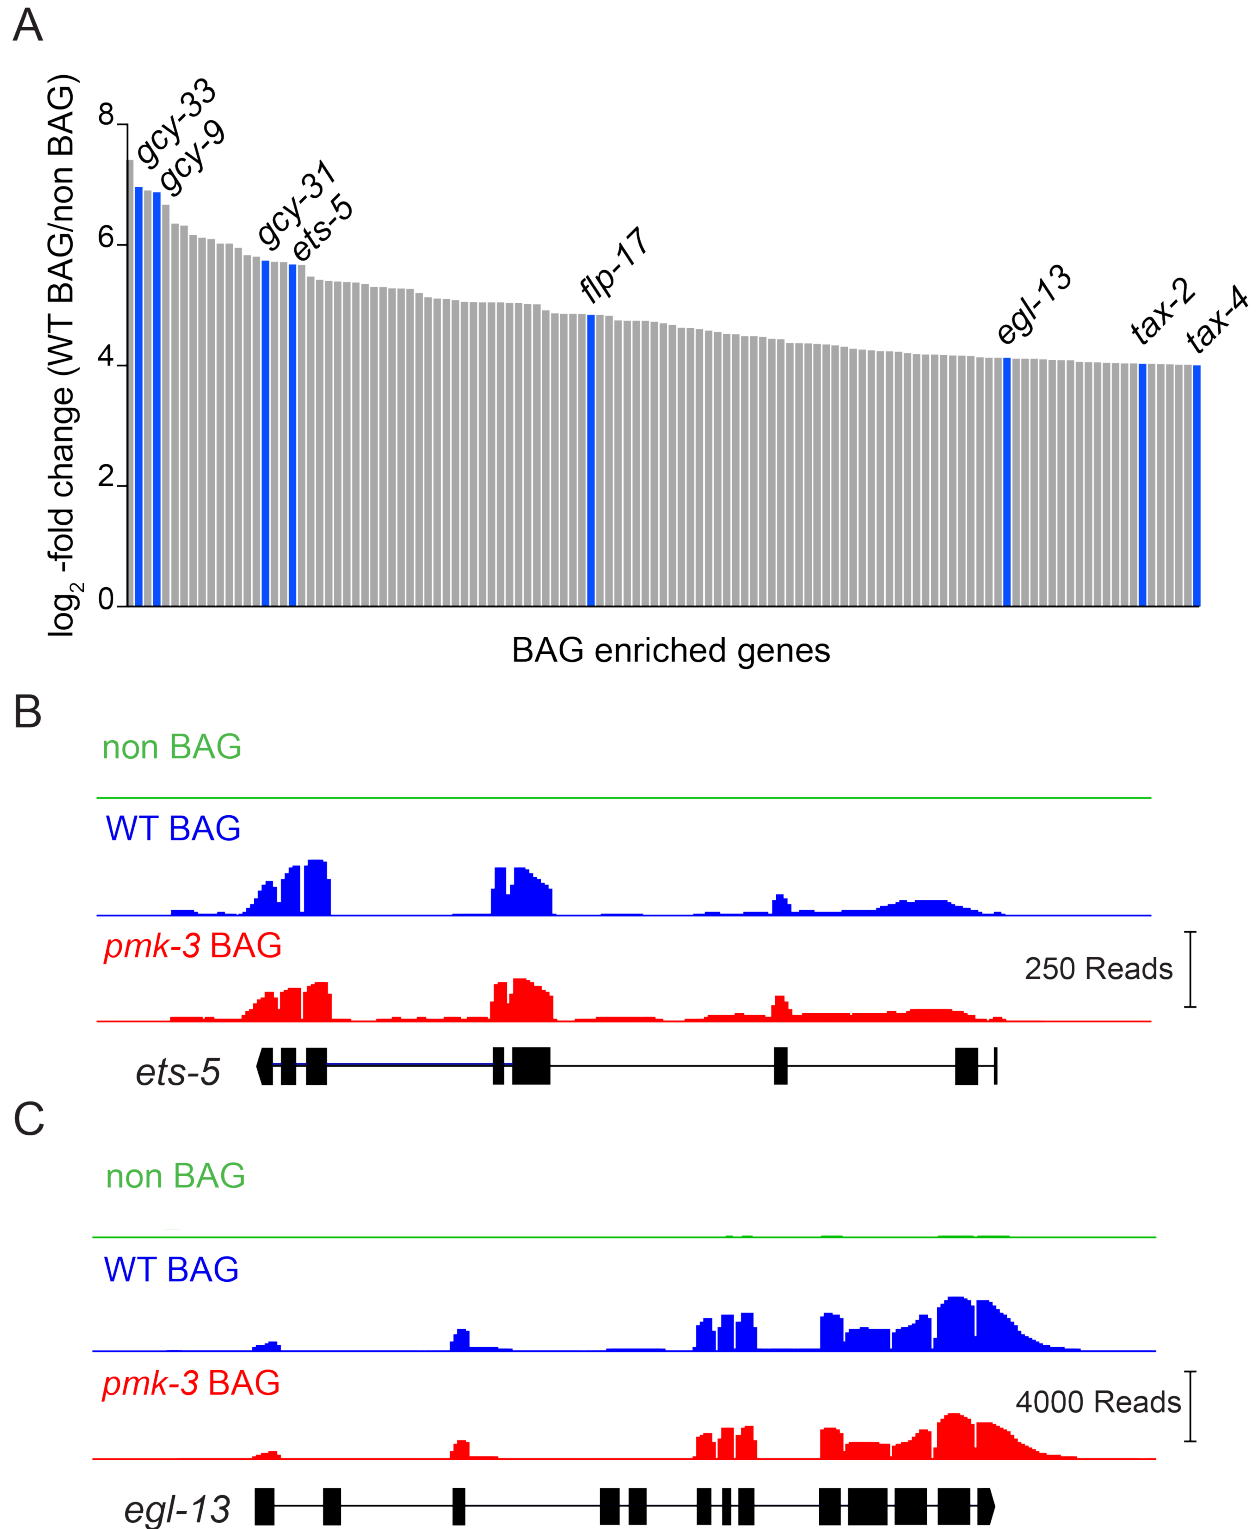

**Figure S8: *pmk-3* mutation does not affect expression of the terminal selectors of the BAG cell fate.** (legend continued on next page)



A. Fold changes of gene expression for the 119 BAG-enriched transcripts identified with RNA-Seq (log<sub>2</sub>fold change of expression in wild-type BAG cells versus non-BAG cells >

4). Blue indicates genes already known to be BAG-enriched. (WT) wild-type.

B-C. Read coverage histograms for transcription factors *ets-5* and *egl-13*, which maintain the BAG cell-fate and are the canonical terminal selectors of the BAG neuron.

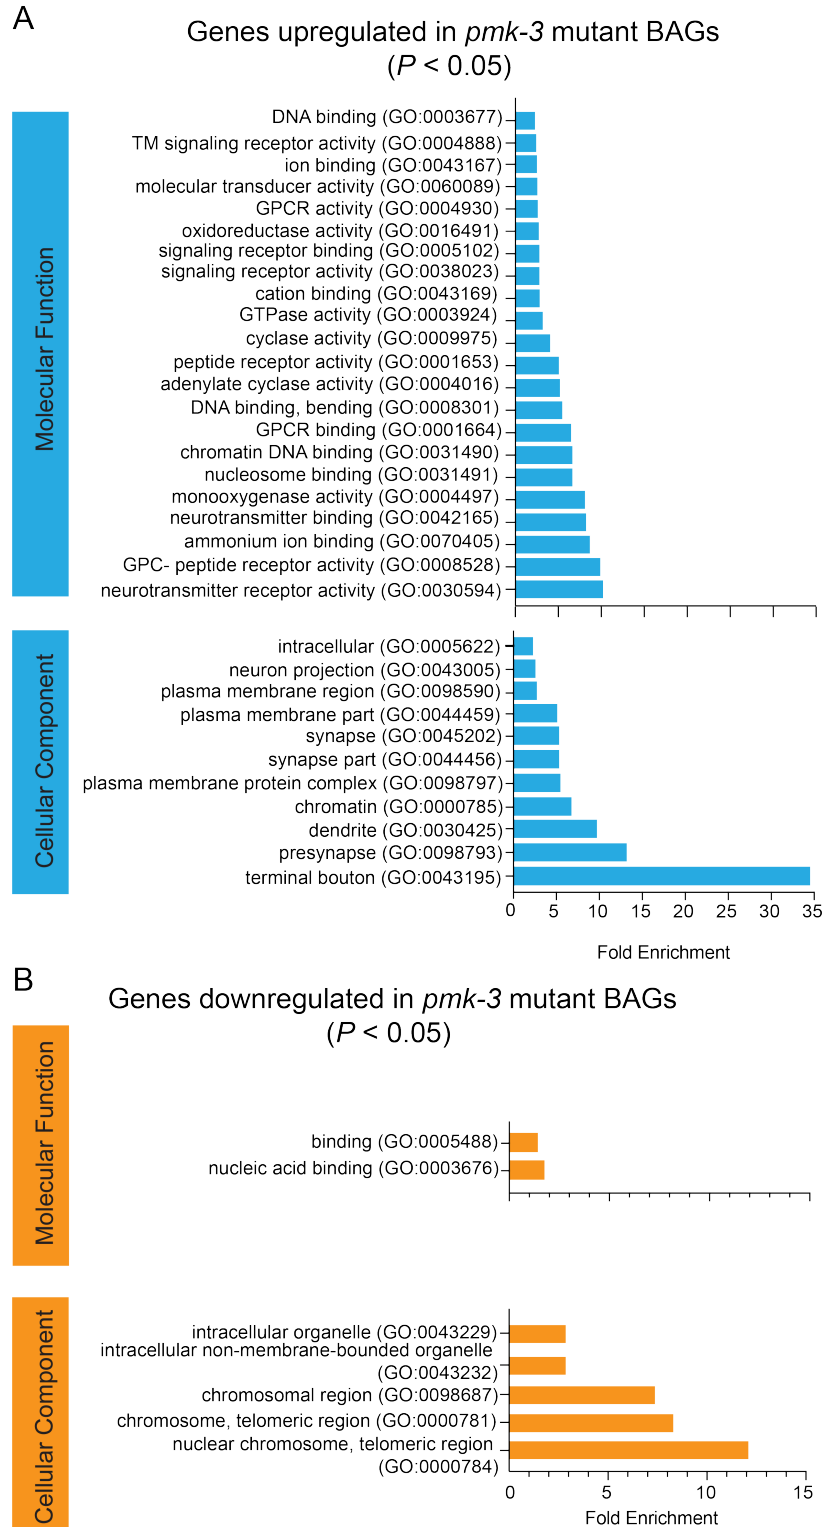

**Figure S9: Overrepresented GO terms in genes significantly up-regulated and down-regulated in *pmk-3* mutant BAG cells.** (legend continued on next page)

A. Molecular function and cellular component classification terms significantly over-represented ( $P < 0.05$ ) amongst the subset of genes up-regulated in *pmk-3* mutant BAG cells (see Materials and Methods).

B. Molecular function and cellular component GO terms significantly enriched ( $P < 0.05$ ) amongst the set of genes down-regulated in *pmk-3* mutant BAG cells. We note that there wasn't any biological process GO terms that were significantly enriched amongst the genes down-regulated in *pmk-3* mutant BAG cells.

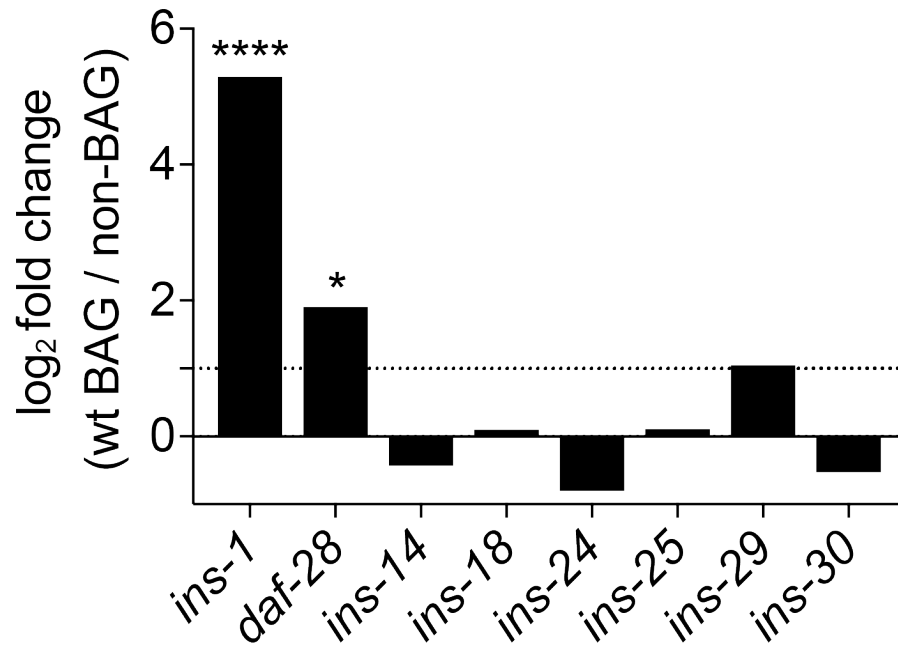

**Figure S10: The insulin like peptides (ILPs), *ins-1* and *daf-28*, are enriched in wild-type BAG cells.**

Fold changes of gene expression in wild-type BAG cells versus non-BAG cells for *ins-1* and the ILPs that are enriched in *pmk-3* mutant BAG cells. (\*)  $P < 0.05$ , (\*\*\*\*)  $P < 0.0001$ .  $P$  values were FDR corrected using DeSeq2 (Love et al., 2014).

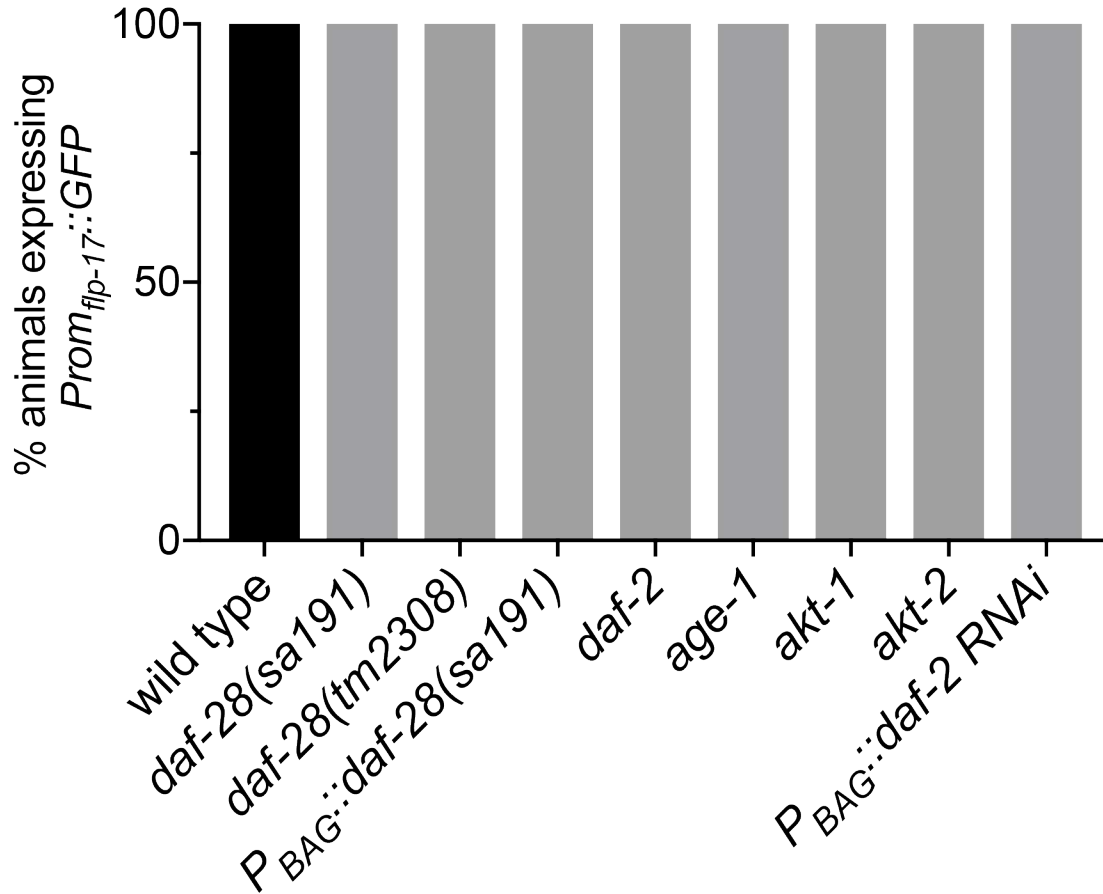

**Figure S11: Loss of autocrine insulin signaling does not affect *flp-17* expression in a wild-type background.**

Percent animals expressing  $P_{flp-17}::GFP$  in the wild type, *daf-28(sa191)*, *daf-28(tm2308)*, *daf-2(e1370)*, *age-1(hx546)*, *akt-1(ok525)*, *akt-2(ok393)* mutant animals. Disrupting insulin production in wild-type BAG cells by over-expressing *daf-28(sa191)*,  $P_{BAG}::daf-28(sa191)$ , and BAG cell-specific knockdown of *daf-2* using RNAi,  $P_{BAG}::daf-2 RNAi$ , also does not affect  $P_{flp-17}::GFP$  expression.  $N \geq 38$  animals/genotype.

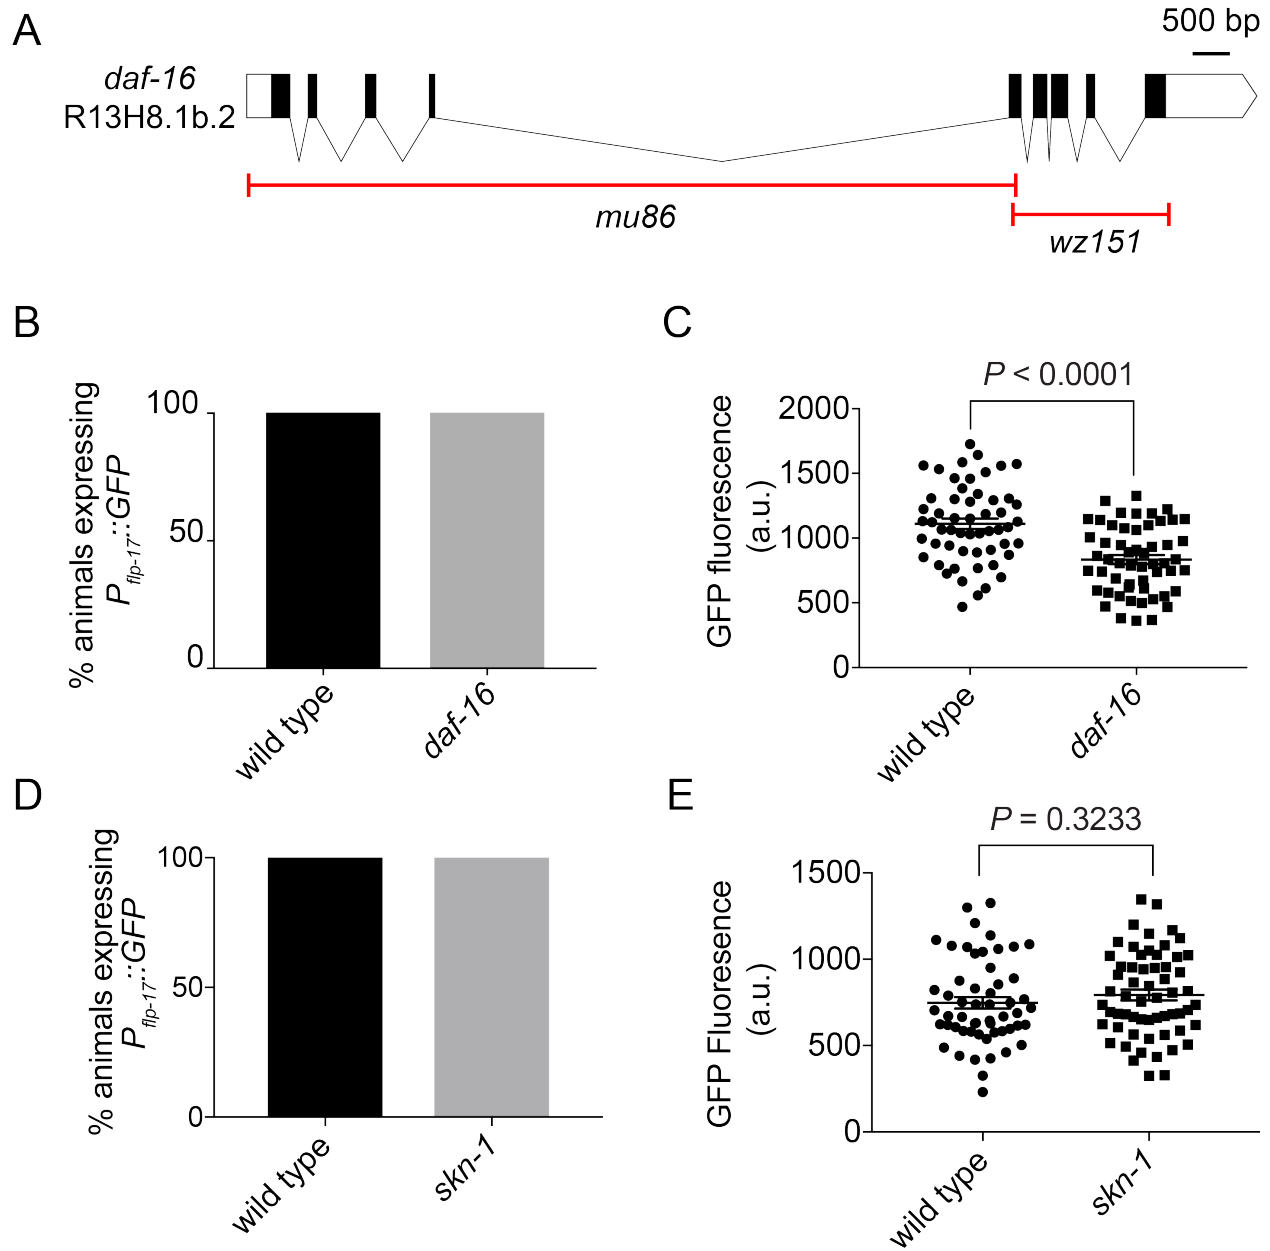

**Figure S12: Loss of DAF-16 reduces levels of *flp-17* expression, while loss of SKN-1 has no effect.**

A. Structure of the *daf-16* genetic locus showing the canonical null allele, *mu86*, and the *wz151* 2065 base pair deletion allele generated using CRISPR/Cas9 mutagenesis (see Materials and Methods).

(legend continued on next page)

B. Percent wild-type and *daf-16(wz151)* mutant animals expressing  $P_{flp-17}::GFP$ . N = 28 animals/genotype.

C. Levels of  $P_{flp-17}::GFP$  fluorescence in the wild-type and *daf-16(wz151)* mutant animals. N = 28 animals/genotype.  $P < 0.0001$ , unpaired t-test. (a.u.) arbitrary units.

D. Percent wild-type and *skn-1(zu67)* mutant animals expressing  $P_{flp-17}::GFP$ . Because *skn-1(zu67)* is maternal effect lethal, *skn-1(zu67)* homozygous mutants were picked from heterozygous mothers carrying the *mls11[myo-2::GFP]* balancer chromosome for analysis. N = 30 animals/genotype.

E. Levels of  $P_{flp-17}::GFP$  fluorescence in the wild-type and *skn-1(zu67)* mutant animals. N  $\geq$  28 animals/genotype.  $P = 0.3233$ , unpaired t-test. (a.u.) arbitrary units.

Error bars represent mean  $\pm$  SEM.

**Table S1: Strains used in this study**

| <b>Identifier</b> | <b>Genotype</b>                                                                                                                                                                                      | <b>Associated Figure</b>                             |
|-------------------|------------------------------------------------------------------------------------------------------------------------------------------------------------------------------------------------------|------------------------------------------------------|
| NY2064            | <i>ynIs64</i> [ <i>P<sub>flp-17</sub>::GFP</i> ]; <i>him-5(e1490)</i>                                                                                                                                | 1A, 2C, 2F, 2G, 3A, 3B, S5, S6, S7, S11, S12         |
| FQ464             | <i>ynIs64</i> [ <i>P<sub>flp-17</sub>::GFP</i> ]; <i>pmk-3(wz31)</i>                                                                                                                                 | 1A, 2A, 2C, 2F, S3                                   |
| N2                | wild type                                                                                                                                                                                            | 1B, 7A-C                                             |
| FQ551             | <i>ynIs64</i> [ <i>P<sub>flp-17</sub>::GFP</i> ]; <i>pmk-3(ok169)</i>                                                                                                                                | 1B, 2G, 3A, 3B, 3D, 5B, 5C, 5D, 6A, 6B, 7A-C, S6, S7 |
| MT15933           | <i>flp-17(n4894)</i>                                                                                                                                                                                 | 1B                                                   |
| MT14665           | <i>egl-6(n4536)</i>                                                                                                                                                                                  | 1B                                                   |
| FQ243             | <i>wzIs82</i> [ <i>P<sub>gcy-9</sub>::YC3.60</i> ]                                                                                                                                                   | 1C, 1D, S1                                           |
| FQ1779            | <i>wzIs82</i> [ <i>P<sub>gcy-9</sub>::YC3.60</i> ]; <i>pmk-3(ok169)</i>                                                                                                                              | 1C, 1D, S1                                           |
| FQ2070            | <i>wzIs168</i> [ <i>P<sub>gcy-9</sub>::nlg-1::GFP<sub>1-10</sub> + P<sub>odr-2b</sub>::nlg-1::GFP<sub>11</sub> + P<sub>gcy-9</sub>::dsRed + P<sub>unc-122</sub>::mCherry</i> ]                       | 1E, 1F, S2                                           |
| FQ2098            | <i>pmk-3(ok169)</i> ; <i>wzIs168</i> [ <i>P<sub>gcy-9</sub>::nlg-1::GFP<sub>1-10</sub> + P<sub>odr-2b</sub>::nlg-1::GFP<sub>11</sub> + P<sub>gcy-9</sub>::dsRed + P<sub>unc-122</sub>::mCherry</i> ] | 1E, 1F, S2                                           |
| FQ841             | <i>ynIs64</i> [ <i>P<sub>flp-17</sub>::GFP</i> ]; <i>pmk-3(wz31) unc-31(wz75)</i>                                                                                                                    | 2B, 2C, S3                                           |
| FQ1125            | <i>ynIs64</i> [ <i>P<sub>flp-17</sub>::GFP</i> ]; <i>unc-31(e169)</i>                                                                                                                                | 2C, S3                                               |
| FQ875             | <i>ynIs64</i> [ <i>P<sub>flp-17</sub>::GFP</i> ]; <i>pmk-3(wz31) unc-31(wz76)</i>                                                                                                                    | 2D                                                   |
| FQ1245            | <i>ynIs64</i> [ <i>P<sub>flp-17</sub>::GFP</i> ]; <i>pmk-3(wz31) unc-31(wz127)</i>                                                                                                                   | 2D                                                   |
| FQ1224            | <i>ynIs64</i> [ <i>P<sub>flp-17</sub>::GFP</i> ]; <i>pmk-3(wz31) unc-31(wz112) unc-31(wz130)</i>                                                                                                     | 2D                                                   |
| FQ873             | <i>ynIs64</i> [ <i>P<sub>flp-17</sub>::GFP</i> ]; <i>pmk-3(ok169)</i> ; <i>him-5(e1490)</i>                                                                                                          | 2F                                                   |
| FQ1204            | <i>ynIs64</i> [ <i>P<sub>flp-17</sub>::GFP</i> ]; <i>unc-64(e246)</i> ; <i>pmk-3(wz31)</i>                                                                                                           | 2F                                                   |
| FQ1212            | <i>ynIs64</i> [ <i>P<sub>flp-17</sub>::GFP</i> ]; <i>unc-64(e246)</i>                                                                                                                                | 2F                                                   |
| FQ1302            | <i>ynIs64</i> [ <i>P<sub>flp-17</sub>::GFP</i> ]; <i>unc-13(e51)</i> ; <i>pmk-3(ok169)</i>                                                                                                           | 2F                                                   |



|        |                                                                                                                                                                      |    |
|--------|----------------------------------------------------------------------------------------------------------------------------------------------------------------------|----|
| FQ1268 | <i>ynIs64[P<sub>flip-17</sub>::GFP] unc-13(e51)</i>                                                                                                                  | 2F |
| FQ1301 | <i>ynIs64[P<sub>flip-17</sub>::GFP]; pmk-3(ok169); unc-18(e81)</i>                                                                                                   | 2F |
| FQ1250 | <i>ynIs64[P<sub>flip-17</sub>::GFP]; unc-18(e81)</i>                                                                                                                 | 2F |
| FQ1244 | <i>ynIs64[P<sub>flip-17</sub>::GFP]; pmk-3(ok169); unc-2(e55)</i>                                                                                                    | 2G |
| FQ1219 | <i>ynIs64[P<sub>flip-17</sub>::GFP]; unc-2(e55)</i>                                                                                                                  | 2G |
| FQ1308 | <i>ynIs64[P<sub>flip-17</sub>::GFP]; pmk-3(ok169) egl-19(n582)</i>                                                                                                   | 2G |
| FQ1307 | <i>ynIs64[P<sub>flip-17</sub>::GFP]; egl-19(n582)</i>                                                                                                                | 2G |
| FQ1637 | <i>ynIs64[P<sub>flip-17</sub>::GFP]; pmk-3(ok169); wzEx289[P<sub>gcy-9</sub>::unc-31_sense + P<sub>gcy-9</sub>::unc-31_antisense + P<sub>unc-122</sub>::mCherry]</i> | 3B |
| FQ1638 | <i>ynIs64[P<sub>flip-17</sub>::GFP]; wzEx289[P<sub>gcy-9</sub>::unc-31_sense + P<sub>gcy-9</sub>::unc-31_antisense + P<sub>unc-122</sub>::mCherry]</i>               | 3B |
| FQ1612 | <i>ynIs64[P<sub>flip-17</sub>::GFP]; pmk-3(ok169); wzEx457[P<sub>rab-3</sub>::unc-31_sense + P<sub>rab-3</sub>::unc-31_antisense + P<sub>unc-122</sub>::mCherry]</i> | 3B |
| FQ1657 | <i>ynIs64[P<sub>flip-17</sub>::GFP]; wzEx457[P<sub>rab-3</sub>::unc-31_sense + P<sub>rab-3</sub>::unc-31_antisense + P<sub>unc-122</sub>::mCherry]</i>               | 3B |
| FQ1443 | <i>ynIs64[P<sub>flip-17</sub>::GFP]</i>                                                                                                                              | 3B |
| FQ1665 | <i>ynIs64[P<sub>flip-17</sub>::GFP]; pmk-3(ok169); wzEx467[P<sub>gcy-9</sub>::irk-1 + P<sub>unc-122</sub>::mCherry]</i>                                              | 3A |
| FQ1710 | <i>ynIs64[P<sub>flip-17</sub>::GFP]; wzEx467[P<sub>gcy-9</sub>::irk-1 + P<sub>unc-122</sub>::mCherry]</i>                                                            | 3A |
| FQ1414 | <i>ynIs64[P<sub>flip-17</sub>::GFP]; pmk-3(ok169); wzEx395[P<sub>rab-3</sub>::irk-1 + P<sub>unc-122</sub>::mCherry]</i>                                              | 3A |

|        |                                                                                                                                      |        |
|--------|--------------------------------------------------------------------------------------------------------------------------------------|--------|
| FQ1438 | <i>ynIs64[P<sub>flp-17</sub>::GFP]; wzEx395[P<sub>rab-3</sub>::irk-1 + P<sub>unc-122</sub>::mCherry]</i>                             | 3A     |
| FQ1601 | <i>ynIs64[P<sub>flp-17</sub>::GFP]; pmk-3(ok169); wzEx448[P<sub>hsp16.4</sub>::irk-1 + P<sub>unc-122</sub>::mCherry]</i>             | 3D     |
| FQ424  | <i>wzIs113[P<sub>gcy-9</sub>::GFP]</i>                                                                                               | 4A-I   |
| FQ705  | <i>wzIs113[P<sub>gcy-9</sub>::GFP]; pmk-3(wz31)</i>                                                                                  | 4A-I   |
| FQ1767 | <i>ynIs64[P<sub>flp-17</sub>::GFP]; pmk-3(ok169); daf-28(tm2308)</i>                                                                 | 5C     |
| FQ1641 | <i>ynIs64[P<sub>flp-17</sub>::GFP]; pmk-3(ok169); daf-28(sa191)</i>                                                                  | 5B, 7A |
| FQ1913 | <i>ynIs64[P<sub>flp-17</sub>::GFP]; pmk-3(ok169); wzEx519[P<sub>gcy-9</sub>::daf-28(sa191) + P<sub>unc-122</sub>::mCherry]</i>       | 5B, 7B |
| FQ1409 | <i>ynIs64[P<sub>flp-17</sub>::GFP]; daf-2(e1370); pmk-3(ok169)</i>                                                                   | 5D     |
| FQ1632 | <i>ynIs64[P<sub>flp-17</sub>::GFP]; age-1(hx546); pmk-3(ok169)</i>                                                                   | 5D, 6B |
| FQ1872 | <i>ynIs64[P<sub>flp-17</sub>::GFP]; pmk-3(ok169); akt-1(ok525)</i>                                                                   | 5D     |
| FQ1876 | <i>ynIs64[P<sub>flp-17</sub>::GFP]; pmk-3(ok169); akt-2(ok393)</i>                                                                   | 5D     |
| FQ2056 | <i>wzEx542[P<sub>gcy-9</sub>::daf-16::GFP + P<sub>gcy-9</sub>::dsRed + P<sub>unc-122</sub>::mCherry]</i>                             | 5E, 5F |
| FQ2094 | <i>daf-2(e1370); wzEx542[P<sub>gcy-9</sub>::daf-16::GFP + P<sub>gcy-9</sub>::dsRed + P<sub>unc-122</sub>::mCherry]</i>               | 5E, 5G |
| FQ2074 | <i>pmk-3(ok169); wzEx542[P<sub>gcy-9</sub>::daf-16::GFP + P<sub>gcy-9</sub>::dsRed + P<sub>unc-122</sub>::mCherry]</i>               | 5F     |
| FQ2127 | <i>daf-2(e1370); pmk-3(ok169); wzEx542[P<sub>gcy-9</sub>::daf-16::GFP + P<sub>gcy-9</sub>::dsRed + P<sub>unc-122</sub>::mCherry]</i> | 5G     |

|                                        |                                                                                                                                                                                      |            |
|----------------------------------------|--------------------------------------------------------------------------------------------------------------------------------------------------------------------------------------|------------|
| FQ1481                                 | <i>ynIs64[P<sub>flip-17</sub>::GFP]; pmk-3(ok169); wzEx408[P<sub>flip-17</sub>::daf-2_sense + P<sub>flip-17</sub>::daf-2_antisense + P<sub>unc-122</sub>::mCherry]</i>               | 5D, 6A, 7C |
| FQ1778                                 | <i>ynIs64[P<sub>flip-17</sub>::GFP] daf-16(wz151); pmk-3(ok169)</i>                                                                                                                  | 6A         |
| FQ1777                                 | <i>ynIs64[P<sub>flip-17</sub>::GFP] daf-16(wz151); pmk-3(ok169); wzEx408[P<sub>flip-17</sub>::daf-2_sense + P<sub>flip-17</sub>::daf-2_antisense + P<sub>unc-122</sub>::mCherry]</i> | 6A         |
| FQ2289                                 | <i>ynIs64[P<sub>flip-17</sub>::GFP]; pmk-3(ok169); wzEx574[P<sub>gcy-9</sub>::skn-1_sense + P<sub>gcy-9</sub>::skn-1_antisense + P<sub>unc-122</sub>::mCherry]</i>                   | 6B         |
| FQ2253                                 | <i>ynIs64[P<sub>flip-17</sub>::GFP]; age-1(hx546); pmk-3(ok169); wzEx574[P<sub>gcy-9</sub>::skn-1_sense + P<sub>gcy-9</sub>::skn-1_antisense + P<sub>unc-122</sub>::mCherry]</i>     | 6B         |
| FQ1740                                 | <i>ynIs64[P<sub>flip-17</sub>::GFP]; daf-28(sa191)</i>                                                                                                                               | 7A, S11    |
| FQ1531                                 | <i>ynIs64[P<sub>flip-17</sub>::GFP]; wzEx408[P<sub>flip-17</sub>::daf-2_sense + P<sub>flip-17</sub>::daf-2_antisense + P<sub>unc-122</sub>::mCherry]</i>                             | 7C, S11    |
| <b>Strains in Supplemental Figures</b> |                                                                                                                                                                                      |            |
| MT17370                                | <i>nIs242[P<sub>gcy-33</sub>::GFP]; lin-15AB(n765)</i>                                                                                                                               | S4         |
| FQ932                                  | <i>nIs242[P<sub>gcy-33</sub>::GFP]; pmk-3(wz31)</i>                                                                                                                                  | S4         |
| FQ1099                                 | <i>nIs242[P<sub>gcy-33</sub>::GFP]; pmk-3(wz31) unc-31(wz75)</i>                                                                                                                     | S4         |
| FQ1131                                 | <i>nIs242[P<sub>gcy-33</sub>::GFP]; unc-31(e169)</i>                                                                                                                                 | S4         |
| FQ223                                  | <i>ynIs64[P<sub>flip-17</sub>::GFP]; ets-5(tm1734)</i>                                                                                                                               | S5         |
| FQ2284                                 | <i>ynIs64[P<sub>flip-17</sub>::GFP]; unc-31(e169); ets-5(tm1734)</i>                                                                                                                 | S5         |
| FQ2301                                 | <i>ynIs64[P<sub>flip-17</sub>::GFP]; egl-13(ku194)</i>                                                                                                                               | S5         |
| FQ2300                                 | <i>ynIs64[P<sub>flip-17</sub>::GFP]; unc-31(e169); egl-13(ku194)</i>                                                                                                                 | S5         |
| FQ2303                                 | <i>ynIs64[P<sub>flip-17</sub>::GFP]; egl-46(n1075)</i>                                                                                                                               | S5         |
| FQ2302                                 | <i>ynIs64[P<sub>flip-17</sub>::GFP]; unc-31(e169); egl-46(n1075)</i>                                                                                                                 | S5         |
| FQ1243                                 | <i>ynIs64[P<sub>flip-17</sub>::GFP]; unc-36(e251); pmk-3(ok169)</i>                                                                                                                  | S6         |

|        |                                                                                                                  |           |
|--------|------------------------------------------------------------------------------------------------------------------|-----------|
| FQ1220 | <i>ynIs64[P<sub>flp-17</sub>::GFP]; unc-36(e251)</i>                                                             | S6        |
| FQ1303 | <i>ynIs64[P<sub>flp-17</sub>::GFP]; pmk-3(ok169); gcy-9(tm2816)</i>                                              | S7        |
| FQ1289 | <i>ynIs64[P<sub>flp-17</sub>::GFP]; gcy-9(tm2816)</i>                                                            | S7        |
| FQ1768 | <i>ynIs64[P<sub>flp-17</sub>::GFP]; daf-28(tm2308)</i>                                                           | S11       |
| FQ1934 | <i>ynIs64[P<sub>flp-17</sub>::GFP]; wzEx519[P<sub>gcy-9</sub>::daf-28(sa191) + P<sub>unc-122</sub>::mCherry]</i> | S11       |
| FQ1381 | <i>ynIs64[P<sub>flp-17</sub>::GFP]; daf-2(1370)</i>                                                              | S11       |
| FQ1634 | <i>ynIs64[P<sub>flp-17</sub>::GFP]; age-1(hx546)</i>                                                             | S11       |
| FQ1874 | <i>ynIs64[P<sub>flp-17</sub>::GFP]; akt-1(ok525)</i>                                                             | S11       |
| FQ1877 | <i>ynIs64[P<sub>flp-17</sub>::GFP]; akt-2(ok393)</i>                                                             | S11       |
| FQ1758 | <i>ynIs64[P<sub>flp-17</sub>::GFP] daf-16(wz151)</i>                                                             | S12A,B, C |
| FQ1838 | <i>ynIs64[P<sub>flp-17</sub>::GFP; mIs11[myo-2::GFP]/skn-1(zu67)</i>                                             | S12D, E   |
| FQ1934 | <i>ynIs64[P<sub>flp-17</sub>::GFP]; wzEx519[P<sub>gcy-9</sub>::daf-28(sa191) + P<sub>unc-122</sub>::mCherry]</i> | S12       |

**Table S2: Plasmids used in this study**

| <b>Constructed Plasmid Name</b> | <b>Description</b>                                  | <b>Injected Concentration</b> |
|---------------------------------|-----------------------------------------------------|-------------------------------|
| pNR634                          | <i>P<sub>gcy-9</sub>::nlg-1::GFP<sub>1-10</sub></i> | 10 - 20 ng ul <sup>-1</sup>   |
| pNR631                          | <i>P<sub>odr-2b</sub>::nlg-1::GFP<sub>11</sub></i>  | 10 - 20 ng ul <sup>-1</sup>   |
| pLBH10                          | <i>P<sub>gcy-9</sub>::unc-31_sense</i>              | 100 ng ul <sup>-1</sup>       |
| pLBH9                           | <i>P<sub>gcy-9</sub>::unc-31_antisense</i>          | 100 ng ul <sup>-1</sup>       |
| pLBH50                          | <i>P<sub>rab-3</sub>::unc-31_sense</i>              | 100 ng ul <sup>-1</sup>       |
| pLBH51                          | <i>P<sub>rab-3</sub>::unc-31_antisense</i>          | 100 ng ul <sup>-1</sup>       |
| pLBH21                          | <i>P<sub>gcy-9</sub>::irk-1</i>                     | 100 ng ul <sup>-1</sup>       |
| pLBH26                          | <i>P<sub>rab-3</sub>::irk-1</i>                     | 100 ng ul <sup>-1</sup>       |
| pLBH49                          | <i>P<sub>hsp-16.4</sub>::irk-1</i>                  | 100 ng ul <sup>-1</sup>       |
| pNR394                          | <i>P<sub>gcy-9</sub>::dsRed</i>                     | 30 ng ul <sup>-1</sup>        |
| pLBH57                          | <i>P<sub>gcy-9</sub>::daf-28(sa191)</i>             | 25 ng ul <sup>-1</sup>        |
| pLBH43                          | <i>P<sub>flp-17</sub>::daf-2_sense</i>              | 100 ng ul <sup>-1</sup>       |
| pLBH44                          | <i>P<sub>flp-17</sub>::daf-2_antisense</i>          | 100 ng ul <sup>-1</sup>       |
| pLBH56                          | <i>P<sub>gcy-9</sub>::daf-16::GFP</i>               | 30 ng ul <sup>-1</sup>        |
| pLBH61                          | <i>P<sub>gcy-9</sub>::skn-1_sense</i>               | 100 ng ul <sup>-1</sup>       |
| pLBH62                          | <i>P<sub>gcy-9</sub>::skn-1_antisense</i>           | 100 ng ul <sup>-1</sup>       |
| Co-injection marker             | <i>P<sub>unc-122</sub>::mCherry</i>                 | 30 - 100 ng ul <sup>-1</sup>  |
